# Supplementary material for: Fast identification of influenza using label-free SERS combined with machine learning algorithms via clinical nasal swab samples
Source: Royal Society of Chemistry journal article supplement (doi:10.1039/d5ay00374a), 2025-01-01
Supplement: d5ay00374a1.pdf [file d5ay00374a1.pdf]

## Supporting information

### **Fast identification of influenza using label-free SERS combined with machine learning algorithm via clinical nasal swab samples**

Shaohua He<sup>a†</sup>, Shibo Cao<sup>b†</sup>, Jiayi Yuan<sup>b#</sup>, Zhaoda Yu<sup>b</sup>, Yi Liu<sup>a</sup>, Yangmin Wu<sup>a</sup>,  
Shuohong Weng<sup>a</sup>, Ming Zong<sup>b\*</sup> and Duo Lin<sup>a\*</sup>

a. Key Laboratory of Optoelectronic Science and Technology for Medicine, Ministry of Education, Fujian Provincial Key Laboratory for Photonics Technology, Fujian Normal University, Fuzhou, 350117, China. E-mail: duo@fjnu.edu.cn

b. Department of Clinical Laboratory, Shanghai East Hospital, Tongji University School of Medicine, Shanghai 200120, China. E-mail: zongming@tongji.edu.cn

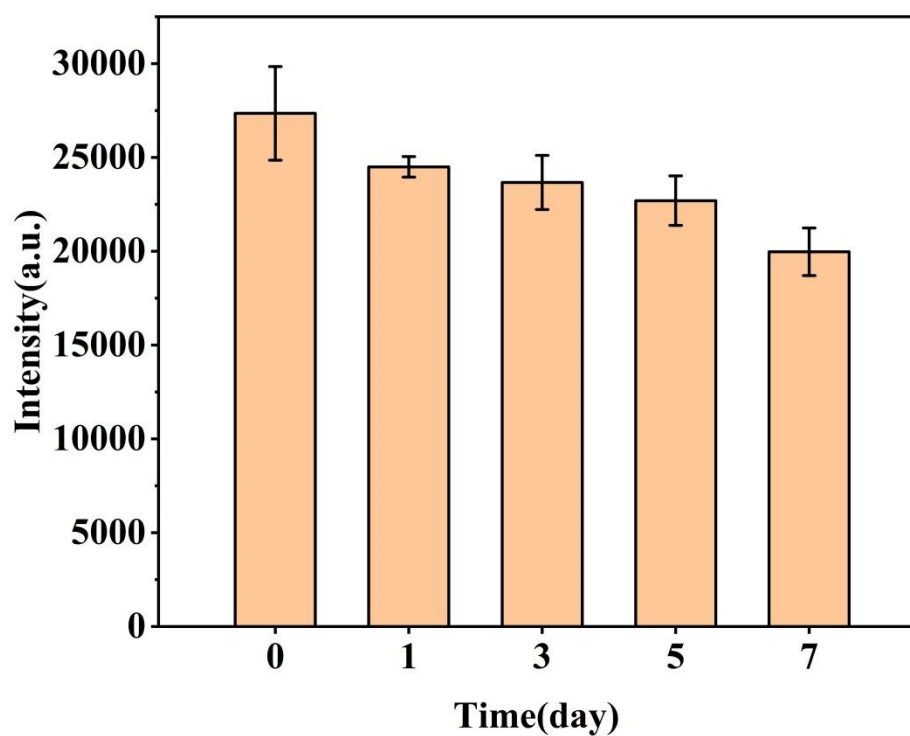

Fig S1. Trend of R6G SERS signal over 7 days

The 6 $\mu$ L R6g solution was mixed with the same volume of concentrated Ag NPs solution and added dropwise to an aluminum sheet to measure its SERS intensity after drying. The laser power was 10mW and the integration time was 1s.

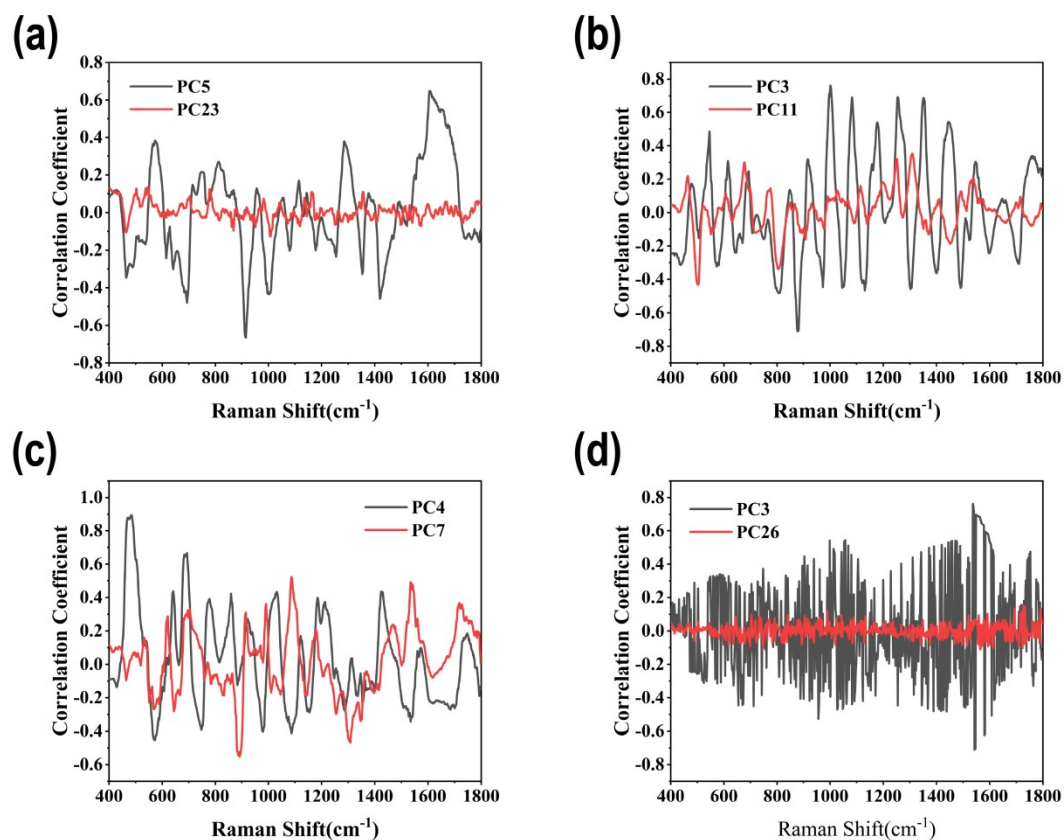

Figure S2. (a) Loading of PC5 and PC23 in Influenza A and Influenza B Groups; (b) Loading of PC3 and PC11 in Influenza B and healthy control Groups; (c) Loading of PC4 and PC7 in Influenza A and healthy control Groups; (d) Loading of PC3 and PC26 in Influenza and healthy control Groups;
